# Supplementary material for: Broad-temperature-span and large electrocaloric effect in lead-free ceramics utilizing successive and metastable phase transitions
Source: Royal Society of Chemistry journal article supplement (doi:10.1039/c9ta10164k), 2019-01-01
Supplement: c9ta10164k1.pdf [file c9ta10164k1.pdf]

## Supporting Information

### **Broad-temperature-span and large electrocaloric effect in lead-free ceramics utilizing successive and metastable phase transitions**

Chunlin Zhao<sup>1</sup>, Junlin Yang<sup>2</sup>, Yanli Huang<sup>1</sup>, Xihong Hao<sup>2,\*</sup> and Jiagang Wu<sup>1,\*</sup>

<sup>1</sup>*Department of Materials Science, Sichuan University, Chengdu, 610064, China*

<sup>2</sup>*School of Materials and Metallurgy, Inner Mongolia University of Science and  
Technology, Baotou, 014010, China*

\*Corresponding author. Email: msewujg@scu.edu.cn and wujiagang0208@163.com

(J. G. Wu); xhhao@imust.edu.cn (X. H. Hao)

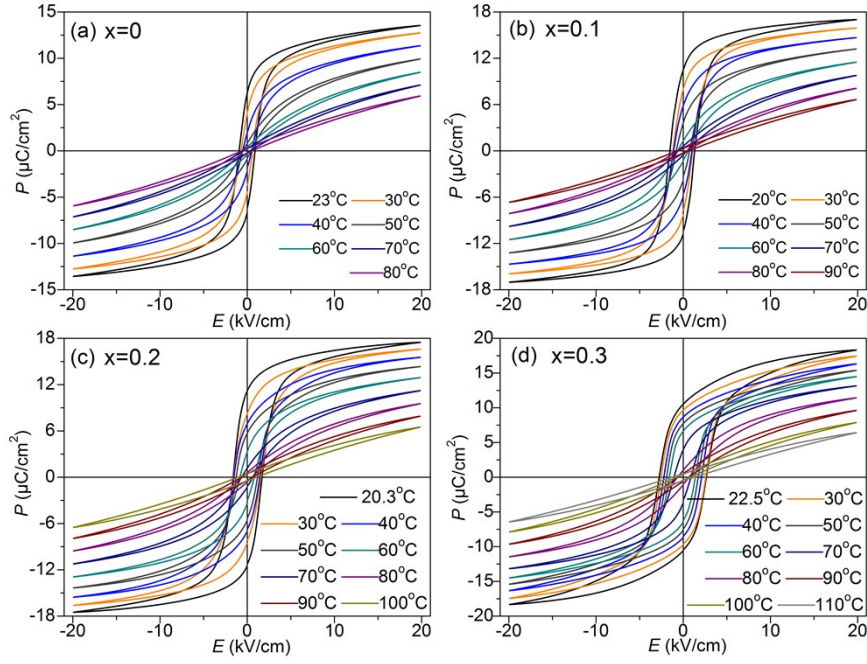

Fig. S1 Temperature-dependent ferroelectric hysteresis ( $P$ - $E$ ) loops with (a)  $x=0$ , (b)  $x=0.1$ , (c)  $x=0.2$ , and (d)  $x=0.3$  measured at 1 Hz from room temperature to 80-110°C.

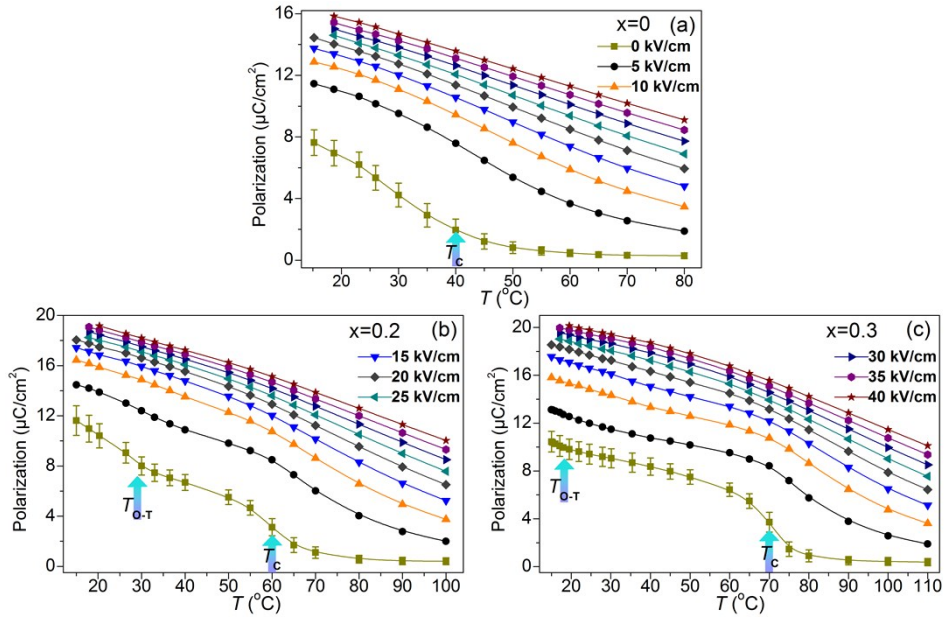

Fig. S2 Temperature-dependent polarization evolution (extracted from the maximum polarization in each  $P$ - $E$  loops) under different electric field for the samples with (a)  $x=0$ , (b)  $x=0.2$ , and (c)  $x=0.3$ . The polarization at 0 kV/cm was obtained from the average value of remnant polarization in each  $P$ - $E$  loops under various electric fields.
